# Supplementary material for: Switchable self-assembly of Prussian blue analogs nano-tiles triggered by salt stimulus
Source: Royal Society of Chemistry journal article supplement (doi:10.1039/c5cp06574g), 2015-12-22
Supplement: c5cp06574g1.pdf [file c5cp06574g1.pdf]

## Supporting Information

### Switchable Self-assembly of Prussian Blue Analogs Nano-tiles Triggered by Salt Stimulus

D. Dedovets, P. Bauduin\*, J. Causse, L. Girard and O. Diat

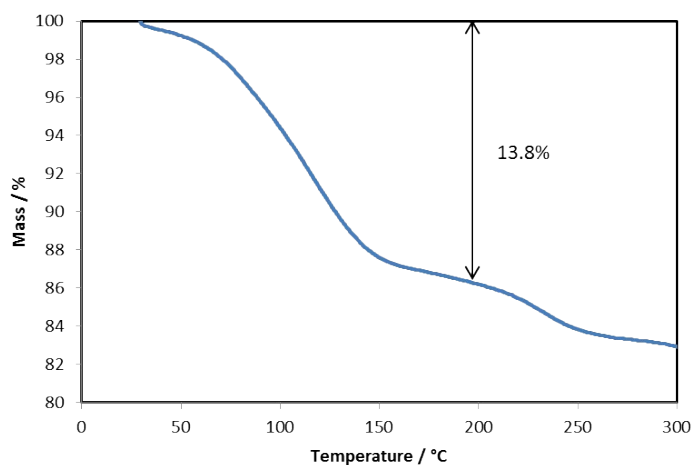

**Fig. S1.** Thermogravimetry data obtained by sample heating with the speed of 5°C/min in nitrogen atmosphere. Mass lost up to 200°C was attributed to the water evaporation and further to decomposition of cyano bonds.

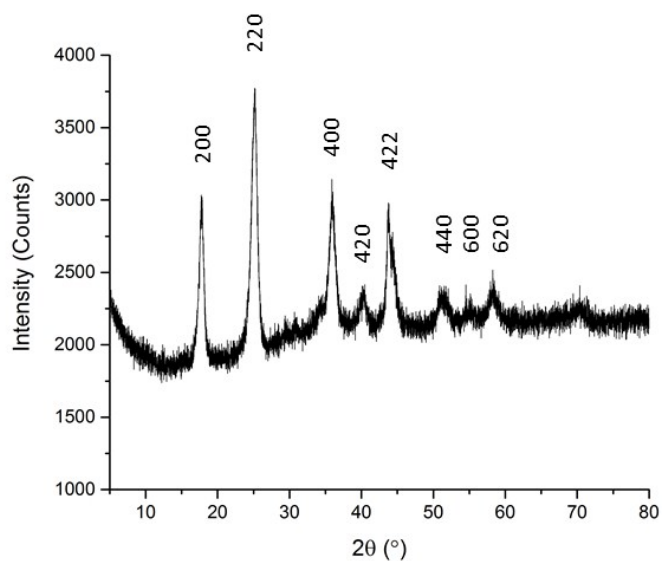

**Fig. S2.** X-Ray powder diffraction pattern of a dried Cu-PBA powder

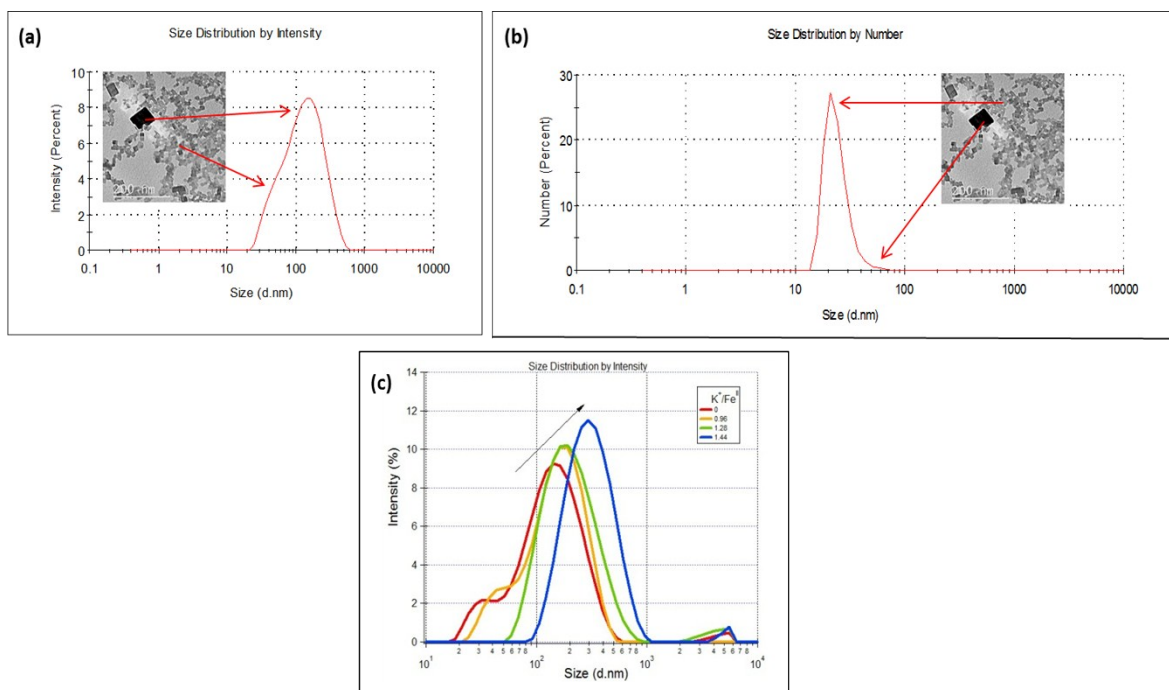

**Fig. S3.** (a) Size distribution by intensity and (b) size distribution by number of 20 mM Cu-BPA suspension (0.85 wt%). Insert shows corresponding TEM image with the domains where nanocrystals aggregate to form platelets. (c) Evolution of the size distribution in intensity by increasing the  $K^+/Fe^{II}$  ratio, i.e. the ionic strength ( $IS = [KNO_3]$ ), for 20 mM of Cu-BPA showing the equilibrium shift between the small and large populations of nanoparticles towards the larger ones.

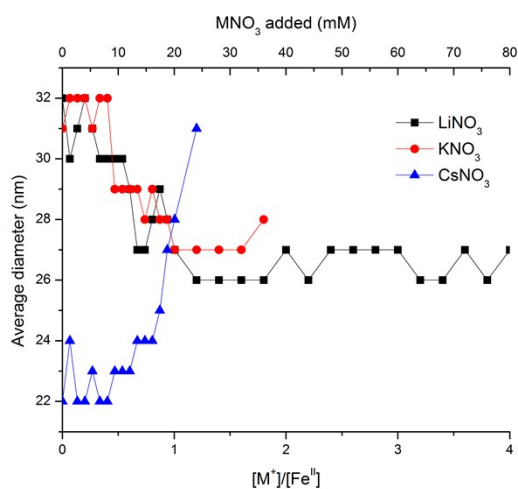

**Fig. S4.** Average diameter determined by acoustic attenuation measurement of Cu-PBA dispersion (20mM) as a function of salt concentration and  $M^+/Fe^{II}$  ratio.

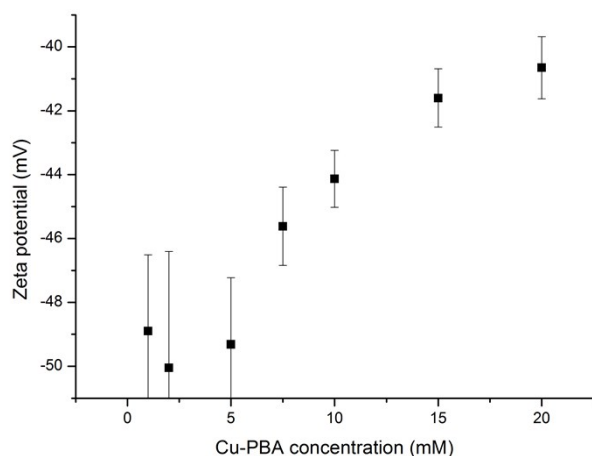

**Fig. S5.** Zeta potential of Cu-PBA nanoparticles as a function of suspension concentration.

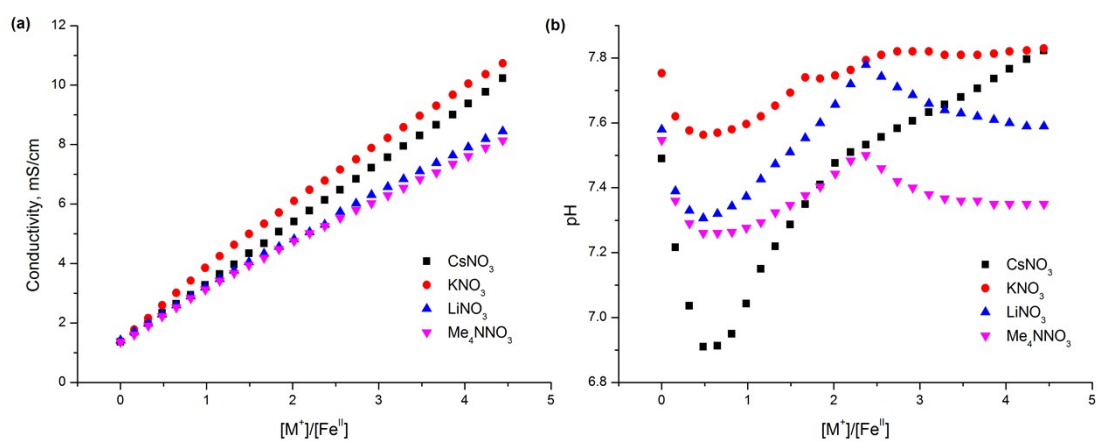

**Fig. S6.** (a) Conductivity and (b) pH of the colloidal Cu-PBA suspension as a function of  $M^+/Fe^{II}$  ratio for different salts.

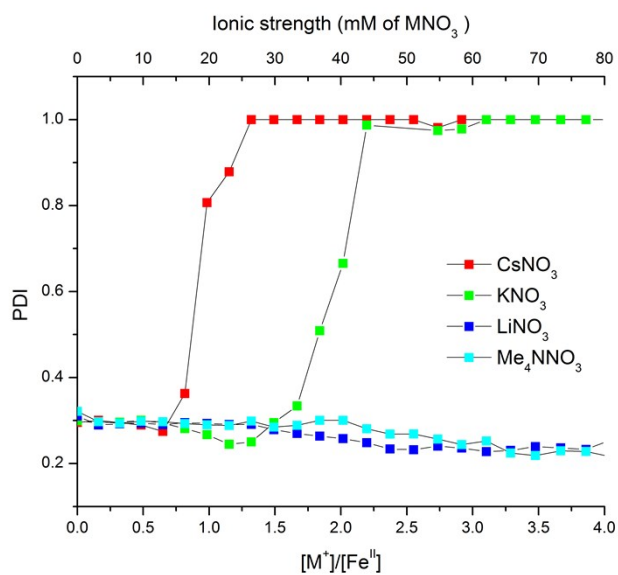

**Fig. S7.** Polydispersity index (PDI) of 20 mM Cu-PBA suspension as a function of ionic strength and  $M^+/Fe^{II}$  ratio as determined from DLS measurements. PDI above 0.3 indicates the NPs flocculation.

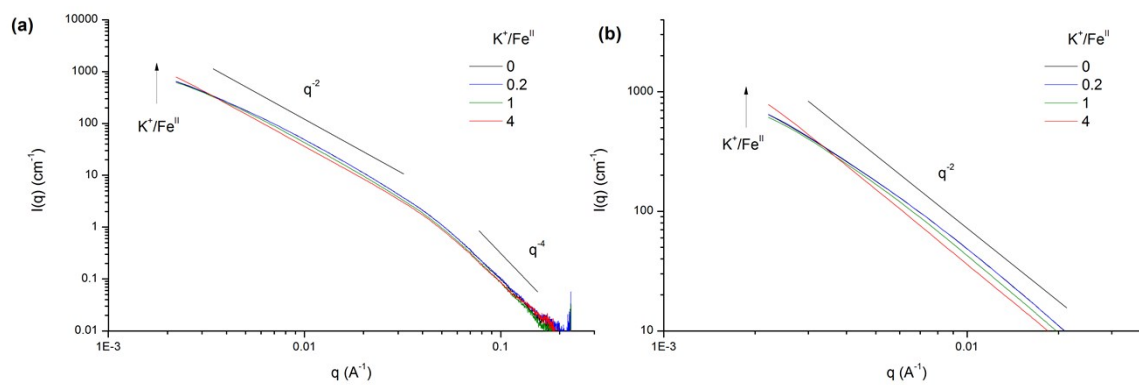

**Fig. S8.** (a) SAXS spectra of 20 mM Cu-PBA suspension upon titration with  $KNO_3$ . (b) Zoom of the region where curves show  $q^{-2}$  dependence.

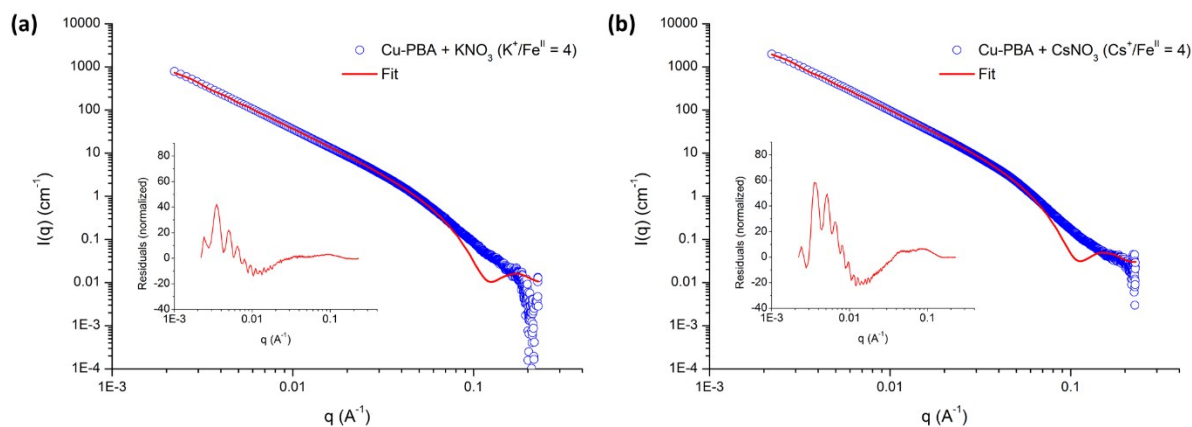

**Fig. S9.** Fitting of synchrotron SAXS data with the Disc model for the 20mM Cu-PBA suspensions in the presence of 80 mM (a)  $\text{KNO}_3$  (disc diameter = 210 nm, thickness = 5.0 nm) and (b)  $\text{CsNO}_3$  (disc diameter = 207 nm, thickness = 5.6 nm). No polydispersity was taken into account for the thickness; this explains the difference between the scattering data and the model at high  $q$ -values, above  $0.1 \text{ \AA}^{-1}$ . Inserts on each plot show normalized residuals of fitting. The structure factor  $S(q)$  characterizing the interactions between NPs was taken to 1 since inter-particles repulsion was suppressed by salt addition.

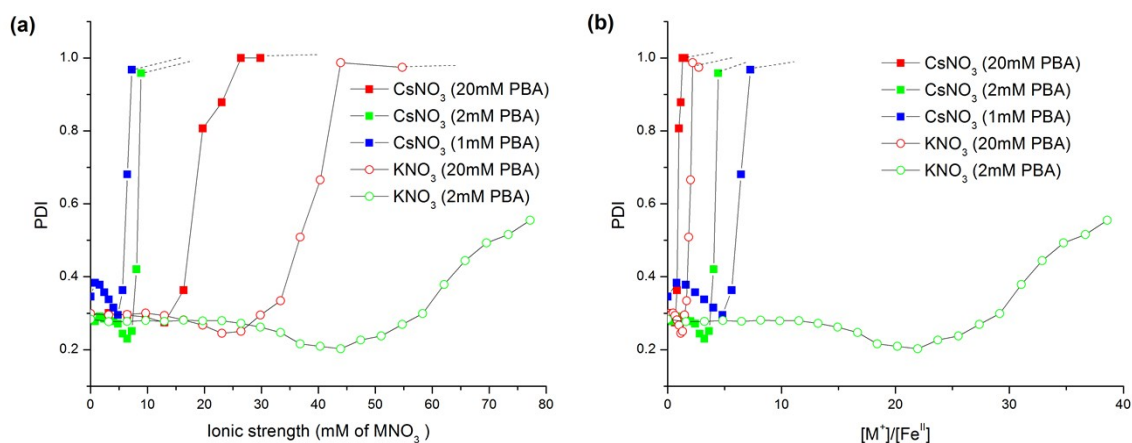

**Fig. S10.** Results of DLS measurements showing for different concentrations of Cu-PBA the evolution of aggregates Polydispersity index (PDI) as a function of the electrolyte

concentration (a) and as a function of the added ion ( $M^+$ ) to  $Fe^{II}$  molar ratio (b). Dashed lines represent conditions under which fast flocculation occurs.

*Expression for hydrodynamic radius of disk particles*

$$R_h = \frac{3}{2}r \left( \left[ 1 + \left( \frac{t}{2r} \right)^2 \right]^{\frac{1}{2}} + \frac{2r}{t} \ln \left[ \frac{t}{2r} + \left[ 1 + \left( \frac{t}{2r} \right)^2 \right]^{\frac{1}{2}} \right] - \frac{t}{2r} \right)^{-1} \quad (1)$$

Equation of the hydrodynamic radius for a disk-shaped nanoparticle as a function of the disk radius  $r$  and its thickness  $t$ , equation extracted from appendix A in ref<sup>1</sup>

## References

1 N. A. Mazer, G. B. Benedek and M. C. Carey, *Biochemistry*, 1980, **19**, 601.
